# Supplementary material for: Random Subspace Sampling for Classification with Missing Data
Source: Springer Nature journal article supplement (doi:10.1007/s11390-023-1611-9), 2024-03-01
Supplement: 11390_2023_1611_MOESM1_ESM.pdf [file 11390_2023_1611_MOESM1_ESM.pdf]

Cao YH, Wu JX. Random subspace sampling for classification with missing data.  
JOURNAL OF COMPUTERSCIENCE AND TECHNOLOGY 39(2): 472–486 Mar. 2024.  
DOI: 10.1007/s11390-023-1611-9

# Random Subspace Sampling for Classification with Missing Data

Yun-Hao Cao (曹云浩), Jian-Xin Wu (吴建鑫)

# Research Objectives

- Scope: Classification with missing data
- Challenge: How to combine classification and imputation *in an efficient way*? How to develop an ensemble method that is effective even when the data *contains many missing values*?
- Contribution: propose an efficient and effective method at different levels of missing data.

# Research Method

- Our method mainly contains three parts:
  - Estimating the histogram distributions of each feature.
  - Constructing neural random subspaces.
  - Sampling for missing features in each subspace.

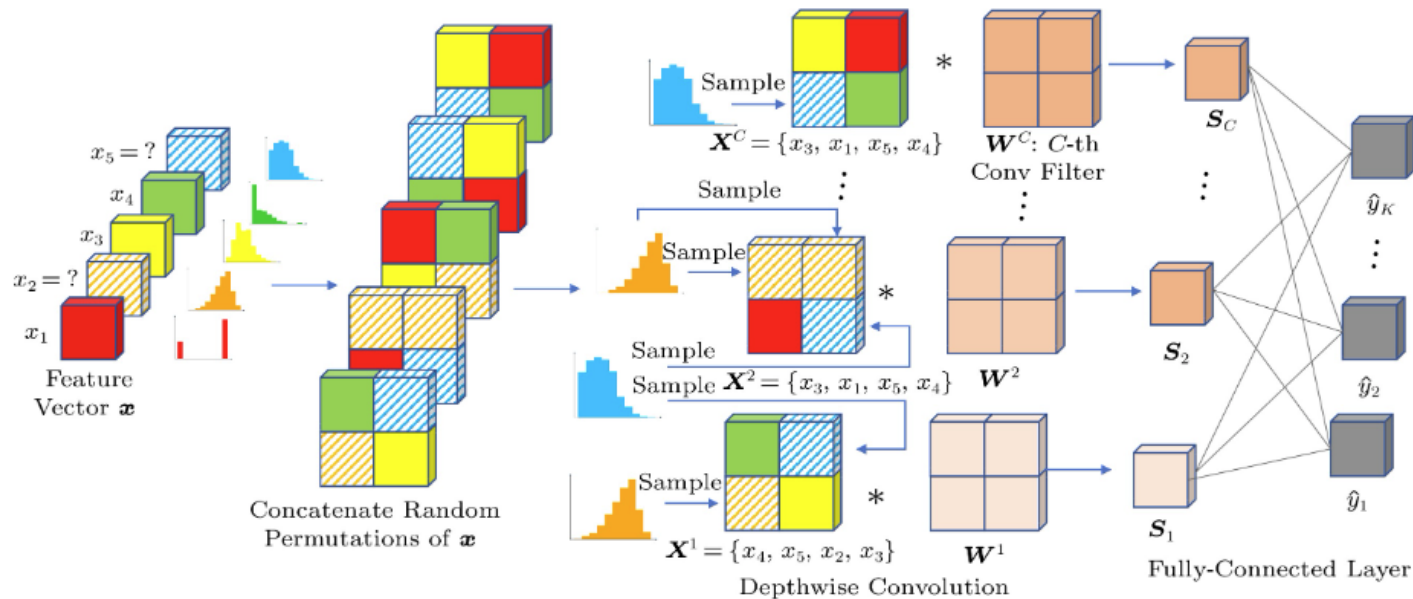

Fig.1. RSS architecture. The input feature vector is  $\mathbf{x} = (x_1, \dots, x_5)$ , where  $x_2$  and  $x_5$  are missing and marked with diagonal lines. For better illustration, we set  $nMul$  to 1 and hence  $C = 5$  and  $\mathbf{X} = \{\mathbf{X}^1, \dots, \mathbf{X}^5\}$ . “\*” denotes the convolution operator.

# Research Results

- We achieve superior performance on 6 incomplete datasets with inherent missing values and 7 complete datasets at 4 levels of artificially introduced missing values.
- Our method has a larger edge over other methods along with the increase of the portion of missing values (i.e., especially effective for large missing portions).

# Research Conclusions

- We proposed a random subspace sampling method RSS for classification with missing data.
- Unlike most established approaches, RSS *does not train on fixed* imputed datasets
- Without the need to train multiple models for ensemble, we use *one single model* for ensemble during inference.
- We will further investigate our method from a theoretical perspective.
